1 **Temporally integrated transcriptome analysis reveals ASFV pathology and host**  
2 **response dynamics**

3

4 Lin Lv<sup>2¶</sup>, Tianyun Zhang<sup>2¶</sup>, Yanyan Zhang<sup>3</sup>, Asif Ahsan<sup>2</sup>, Xiaoyang Zhao<sup>2</sup>, Zhiqiang Shen<sup>4,5\*</sup>, Teng  
5 Chen<sup>3\*</sup>, Ning Shen<sup>1,2\*</sup>

6 1 Department of Hepatobiliary and Pancreatic Surgery, First Affiliated Hospital, College of Medi-  
7 cine, Zhejiang University, Hangzhou, Zhejiang Province, 311121, China

8 2 Liangzhu Laboratory, Zhejiang University Medical Center, Zhejiang University, Hangzhou,  
9 Zhejiang Province, 311121, China

10 3 Changchun Veterinary Research Institute, Chinese Academy of Agricultural Sciences, Changchun,  
11 Jilin Province, 130122, China

12 4 Shandong Binzhou Academy of Animal Science and Veterinary Medicine, Shandong Academy of  
13 Agricultural Sciences, Binzhou, Shandong Province, 256600, China

14 5 Shandong Lvdu Bio-Sciences and Technology CO., LTD, Binzhou, Shandong Province, 256600,  
15 China

16 6 Lead contact: shenningzju@zju.edu.cn

17 ¶ L.L. and T.Z. contributed equally to this work.

18 \*To whom correspondence should be addressed. Email: shenningzju@zju.edu.cn;  
19 ctcx1991@163.com; bzshenzq@163.com.

20

21

22

23

24

25

26

27

28

29

30

31

## 32 **Abstract**

33 African swine fever virus (ASFV) causes a lethal swine hemorrhagic disease and is currently re-  
34 sponsible for widespread damage to the pig industry. The molecular mechanisms of ASFV patho-  
35 genicity and its interaction with host responses remain poorly understood. In this study, we profiled  
36 the temporal viral and host transcriptomes in porcine alveolar macrophages (PAMs) infected at 6,  
37 12, 24 and 48 hours with highly virulent (SY18) and low virulent (HuB20) ASFV strains. We first  
38 identified profound differences in the virus expression programs between SY18 and HuB20, while  
39 the transcriptome dynamics in host cells were dominated by infection time. Through integrated  
40 computational analysis and experimental validation, we identified differentially expressed genes  
41 and related biological processes, and elaborated differential usage of the NF-kappaB related path-  
42 ways by the two virus strains. In addition, we observed that compared to the highly virulent SY18  
43 strain, HuB20 infection quickly activates expression of receptors, sensors, regulators, as well as  
44 downstream effectors, including cGAS, STAT1/2, IRF9, MX1/2, suggesting rapid induction of a  
45 strong immune response. Lastly, we constructed a host-virus coexpression network, which shed light  
46 on pathogenic functions of several ASFV genes. Taken together, these results will provide a basis  
47 for further mechanistic studies on the functions of both viral and cellular genes that are involved in  
48 different responses.

## 50 **Author Summary**

51 Since it was first described in Kenya in 1921, ASF has spread across sub-Saharan Africa, the Car-  
52ibbean, the Western Europe, the Trans-Caucasus region, and the Russian Federation. Recent out-  
53breaks have also been reported in Asia, which has devastated the pig industry, resulting in an ap-  
54proximately 40% reduction in pork worldwide. In the absence of effective vaccine or treatment, the  
55mortality for infections with highly virulent strains approaches 100%, while low virulent strains  
56causing less mortality spreads fast recently. Nevertheless, the mechanisms of ASFV pathogenicity,  
57especially the differences between highly and low virulent strains remain poorly understood. Here,  
58we used RNA-seq to analyze the viral and host transcriptome changes in PAMs infected with a  
59virulent strain (SY18) or an attenuated strain (HuB20) at different stages. We found that the presence  
60of ASFV significantly affected the cellular transcriptome profile. In addition, we did temporal and  
61described the dynamic expression programs induced in the host cells by ASFV infection of different  
62virulence strains. In particular, we identified differential gene expression patterns in host innate

63 immune responses and expressed cytokines and chemokines between ASFV strains of different vir-  
64 ulence. Our study provides new insights into ASFV pathogenicity research and novel drug or vac-  
65 cine targets.

66

## 67 **Introduction**

68 African swine fever, caused by African swine fever virus (ASFV), is a fatal hemorrhagic disease of  
69 domestic and wild pigs (1-3). Outbreaks of ASF have spread rapidly throughout Eastern Europe,  
70 Africa and Asia, making ASF a major threat to the pig industry worldwide, especially in the last  
71 decade (4, 5). ASFV is one of the most complex DNA viruses known to date, encoding over 150  
72 proteins involved in a variety of stages of ASFV life cycle, including evasion of host immune re-  
73 sponse, entry into host cells, RNA modification, DNA repair, and virion assembly (6). Macrophages  
74 and monocytes are the primary targets of ASFV and are thought to be critical for virus replication  
75 and dissemination (6, 7). Despite extensive research on ASFV and its devastating effects on the host,  
76 no effective drug or vaccine is available (4). A major restriction in the development of effective  
77 ASFV antiviral therapies is due to the limited understanding of the molecular mechanisms of ASFV  
78 transcription and its interaction dynamics with the host cell, i.e., studies of a single gene or pathway  
79 of ASFV infection fail to provide a satisfactory understanding of the host-virus interaction dynamics  
80 (4, 8, 9). Consequently, comprehensive profiling of ASFV gene expression and its interaction with  
81 the host transcriptome is highly valuable, as it may provide novel insights for the development of  
82 antiviral therapies and effective vaccines.

83 RNA sequencing (RNA-Seq) is a high-throughput experiment that can be applied to profile the  
84 transcriptome of host and virus during infection (10-13). Using RNA-seq, researchers quantified  
85 gene expression levels in Vero cells infected with ASFV-BA71V at early (5 hour) and late (16 hour)  
86 stages, providing insights into the temporal expression of known and novel viral genes (14). How-  
87 ever, the use of non-ASFV targeted cells is suboptimal and may introduce bias. Another study pro-  
88 filed ASFV transcripts in the blood of pigs infected with either virulent (Georgia 2007, GRG) or  
89 attenuated (OURT33) strains. This analysis showed unique gene expression patterns between GRG  
90 and OURT33, including host genes associated with macrophages and natural killer (NK) cells, and  
91 viral genes associated with modification of host immunity (15). However, a limitation of this study  
92 is that they used mixed cell types, thus transcriptomic changes in the host cells may be complicated  
93 by secondary effects in uninfected cells. Some studies also applied RNA-seq to describe the gene  
94 expression of porcine alveolar macrophages (PAMs) infected with the highly virulent ASFV strain  
95 Malawi LIL20/1, Georgia 2007 or CN/GS/2018, where changes in some important cytokines and  
96 transcription factors in host cells after ASFV infection were reported (16-18). However, the dynamic

97 transcriptome changes in host cells after ASFV infection, especially the more common low virulent  
98 ASFV strains, remain unclear.

99 Previous studies have demonstrated that inhibition of interferons (IFNs) is a crucial strategy  
100 utilized by ASFV to evade immune responses (19-22). The highly virulent ASFV strains can sup-  
101 press the immune response by encoding genes such as the multigene family 360 (MGF360) and mul-  
102 tigenic family 505 (MGF505), while attenuated strains, on the contrary, are less studied in this regard  
103 (23-26). In particular, differences in the host cell immune response following infection with ASFV  
104 of different virulence remain poorly understood. Thus, elucidation of the host immune response of  
105 different strains could provide insightful perspectives on ASFV immune evasion strategies and shed  
106 light on new vaccine development strategies.

107 Cytokines and chemokines are critical to macrophage function, such as regulating effective  
108 immune responses, and linking innate and adaptive immunity (27-31). As a result, ASFV is known  
109 to antagonize immune and inflammatory responses by controlling host cell cytokines and chemo-  
110 kines expression (21). *In vitro* studies on macrophages showed that the low virulent ASFV NH/P68  
111 strain induced high expression of IFN- $\alpha$ , IL-6, TNF- $\alpha$  and IL-12 compared to the highly virulent  
112 ASFV L60 strain, while another studies showed that both the NH/P68 and 22653/14 (highly virulent)  
113 strains negatively regulated IL-6, IL-12 and TNF- $\alpha$  release in macrophages (32, 33). The conflicting  
114 results may be due to differences in the virulence of the strains tested, the dose and duration of  
115 infection or sampling timepoints. Therefore, an experimental design to better understand the pattern  
116 of cytokines and chemokines changes after ASFV infection will be beneficial to the understanding  
117 of ASFV pathogenicity.

118 In this study, we performed RNA-Seq experiments on PAMs infected with virulent (SY18) or  
119 attenuated (HuB20) ASFV strains across multiple stages of virus infection, and profiled the tran-  
120 scriptome of the virus and host respectively. Both SY18 and HuB20 strains belong to type II ASFV,  
121 where SY18 strain was firstly obtained from specimens in the initial ASF outbreak in northeastern  
122 China and caused almost 100% mortality in pigs. The HuB20 strain is a naturally attenuated ASFV  
123 isolated from southern China that causes 30-40% death in infected pigs and is always mild in clinical  
124 symptoms. We characterized the temporal expression dynamics of both host and virus genes and  
125 enriched functions. In particular, we identified distinct differentially expressed host genes involved  
126 in NF-kappaB pathways, differences in the host innate immune response, and distinct expression  
127 patterns of cytokines and chemokines in response to ASFV infection between strains of different  
128 virulence. Our results help provides insights into a comprehensive understanding of the host-virus  
129 interaction dynamics after ASFV infection, as well as the differential expression programs between  
130 the virulent and attenuated strains.

## 131 Results

### 132 Landscape of host-virus transcriptome dynamics in two ASFV strains

133 To study the dynamics of the host-virus transcriptome during ASFV infection, we infected PAMs  
134 with SY18 and HuB20, two ASFV strains of different virulence, and profiled their transcriptome  
135 through RNA-Seq at 6, 12, 24 and 48 hours post infection (hpi), respectively (Fig 1A). Principal  
136 component analysis (PCA) of the virus transcriptome suggests that expressional variation between  
137 the two virus strains (strain-specific) dominates the transcriptome variation among all samples, ex-  
138 plaining 88% of all variation on PC1, whereas time-course expression variation within virus strains  
139 only accounts for 3% variation on PC2. This indicates that expressional differences between the  
140 virus strains might play a major role in the virulence of the two virus strains (Fig 1B). In contrast,  
141 transcriptome profiling of the host genome identifies time-course changes as a dominant variation,  
142 in contrast to strain specific differences, where 70% of the variance aligned with infection time-  
143 course (Fig 1C). This indicates that transcriptional responses on the host cells are not distinctly  
144 different between the two virus strains, despite distinct clinical outcomes. Nevertheless, we still  
145 observed larger variation in the host transcriptome between two virus strains infected with the same  
146 timepoint than between biological replicates of the same condition, suggesting that a differential  
147 host response in expression exists with infection of the two ASFV strains.

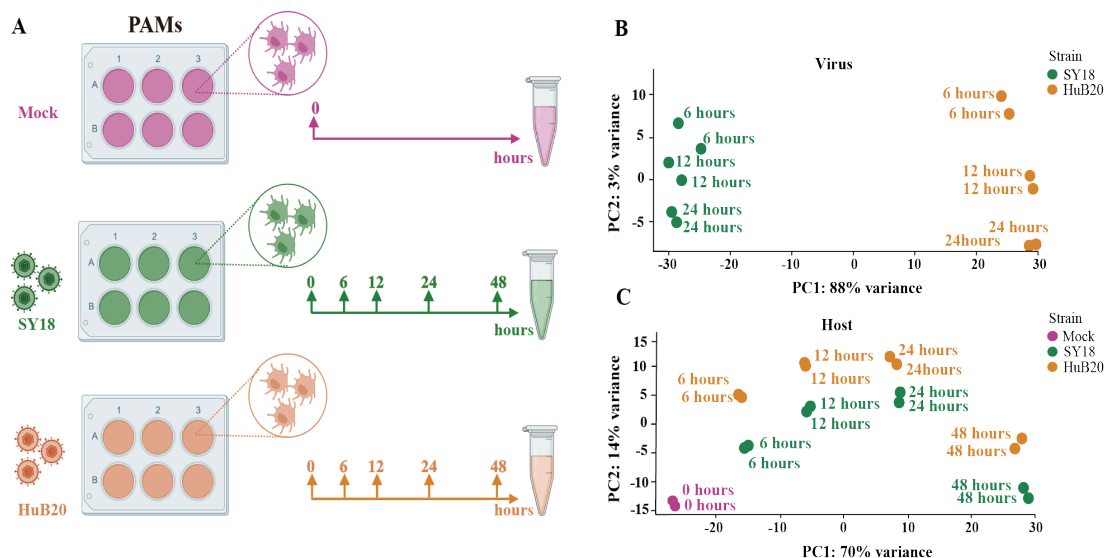

**Fig 1. RNA-seq analysis of ASFV strains-infected PAMs.** (A) The workflow represents the process of sample collection in this study. PAMs were mock-infected or infected with ASFV strain SY18 or HuB20 (MOI= 3), followed by sample collection at 6, 12, 24 and 48 hpi. Total RNA was extracted and polyA enriched RNA sequencing was performed. The principal component of each sample was analyzed considering the virus genes (B) or host genes (C) expression in the corresponding sample. Samples corresponding to each experimental group were plotted on the first two principal components.

## 148 Viral gene expression programs and functional annotation

149 To study the viral expression programs of SY18 and HuB20, we plotted the temporal gene expres-  
 150 sion profiles of all viral genes in a replication cycle (6, 12 and 24 hpi), as indicated by the PCA plot  
 151 of the two virus strain transcriptomes (Fig S1A and B). Figure 2A demonstrates the viral gene ex-  
 152 pression profiling of SY18 and HuB20 strains. We identified six clusters according to their expres-  
 153 sion pattern (S1 Table). Cluster III and VI presented similar expression patterns, while cluster I, II,  
 154 IV and V showed distinct expression programs between the two virus strains. Consistent with pre-  
 155 vious reports involving point mutations and deletions of many genes in HuB20 compared to SY18  
 156 (34), our results demonstrated that the dynamic viral gene expression programs between the two  
 157 virus strains were dramatically different as well.

158 Next, we annotated the 184 viral genes with functional groups and profiled the functional com-  
 159 position of different clusters of viral gene expression programs (Figure 2B). Interestingly, cluster  
 160 III, which contains constitutively highly expressed genes in both virus strains, presented the most

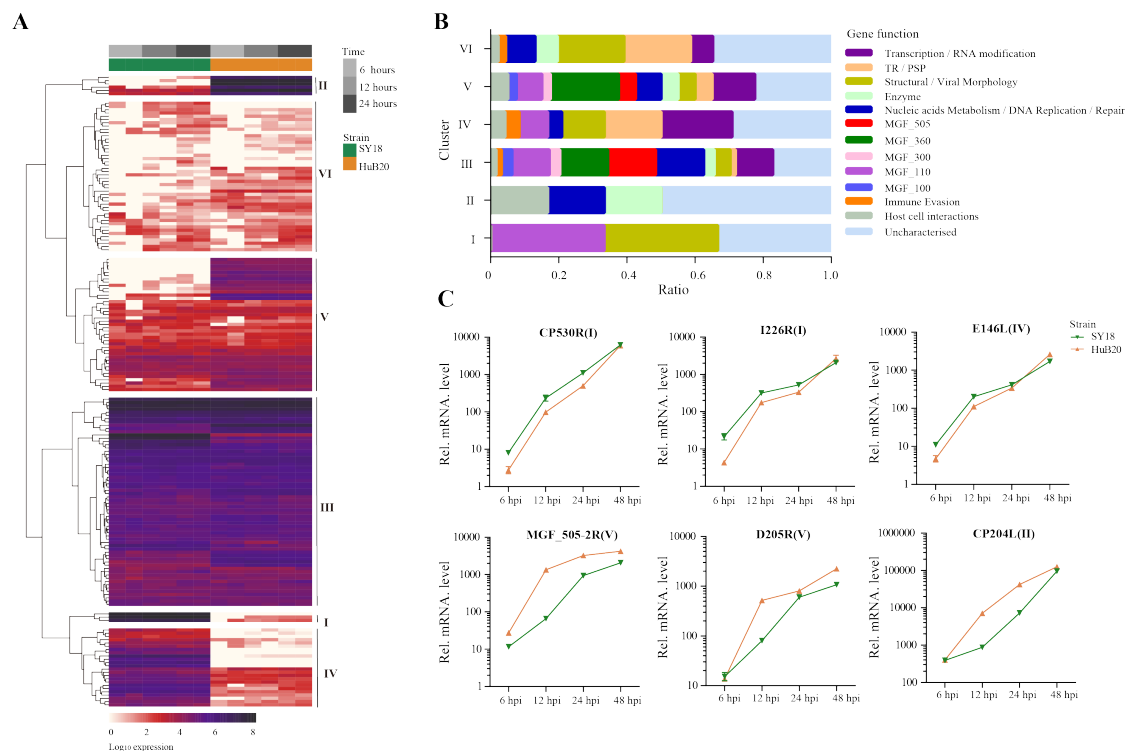

**Fig 2. Expression analysis and functional classification of ASFV genes.** (A) Heatmap shows the expression levels for the 184 viral genes in the ASFV SY18 and HuB20 strains. (B) The functional classification of the detected 184 ASFV genes in SY18 and HuB20 strains, annotated with the most enriched function and divided into 7 clusters. (C) Validation of randomly selected ASFV gene expression by real-time PCR. At 6, 12, 24, and 48 hours after PAMs were infected with ASFV SY18 and HuB20 strain (MOI= 3), the transcriptional level of CP530R, I226R, E146L (highly expressed in the SY18 strain infected group) and MGF\_202-R, D205R, CP204L (highly expressed in the HuB20 strain infected group) were detected by RT-qPCR. The fold-difference was measured by the  $2^{-\Delta\Delta C_t}$  method. The RNA levels were normalized to the corresponding  $\beta$ -actin.

161 versatile functions covering all categories of functional groups. On the contrary, functional groups  
162 for genes in cluster VI mainly involves structural/viral morphology, transmembrane region/putative  
163 signal peptide (TR/PSP), and DNA replication, with no MGF family genes involved, suggesting that  
164 genes associated with viral particle packaging, maturation and propagation were consistently ex-  
165 pressed at relatively late timepoints after virus infection for both SY18 and HuB20.

166 The rest of the clusters encode cluster I and IV, which were expressed higher in SY18, and  
167 cluster II and V that were expressed higher in HuB20, respectively. Functional annotations of both  
168 sides of gene clusters encompass diverse functional categories, with SY18 high expression cluster  
169 IV containing several genes involved in immune evasion, while HuB20 high expression clusters  
170 cover more diverse MGF family genes. In addition, we confirmed the differential expression levels  
171 of selected viral genes from both sides of the clusters using RT-qPCR (Figure 2C). Thus, our results  
172 suggested distinct differences in viral gene transcription programs between the two strains over time.  
173 The dynamic viral gene expression programs and functional annotations in our analysis might con-  
174 tribute to the understanding of the cooperative viral gene functions and pathogenicity differences of  
175 ASFV strains with different virulence.

#### 176 **Host transcriptome dynamics after infection of two ASFV strains**

177 In addition to the virus transcriptome, we also analyzed the host transcriptome along different in-  
178 fection stages of the two virus strains. A total of 2320 significant differentially expressed genes  
179 (DEGs) (1345 upregulated and 975 downregulated) and 2304 DEGs were identified in SY18 and  
180 HuB20 (1321 upregulated and 983 downregulated) respectively, compared to mock-infected sam-  
181 ples ( $P < 10^{-10}$ ) (Fig 3A). Meanwhile, approximately two thirds of the DEGs were (988 in the up-  
182 regulated group and 698 in the down-regulated group) shared by the two strains (Fig 3B), confirm-  
183 ing that similar level of transcriptome response was stimulated by the two virus strains of different  
184 virulence. However, about one third of the DEGs demonstrated specificity between SY18 and  
185 HuB20 strains in both upregulated and downregulated group, suggesting that potentially diverse  
186 expression programs were involved in the host transcriptome after infection with the two virus  
187 strains.

188 To further investigate the expressional programs in the host response resulting from SY18 and  
189 HuB20 infection, we grouped the DEGs into a total of 28 clusters (13 clusters in SY18 strains and  
190 15 clusters in HuB20 strains) of coexpressed genes based on their expression patterns (Fig 3C, S2  
191 Table). A large fraction of DEGs in the up- and downregulated groups, categorized as cluster I,  
192 demonstrated linear expression changes along with time, implying cumulative effects of expres-  
193 sional changes in the host cell after virus infection. Additionally, we observed varying patterns of

194 coexpressed gene clusters across different timepoints, suggesting that multiple dynamic transcrip-  
 195 tional programs were involved in the host response.

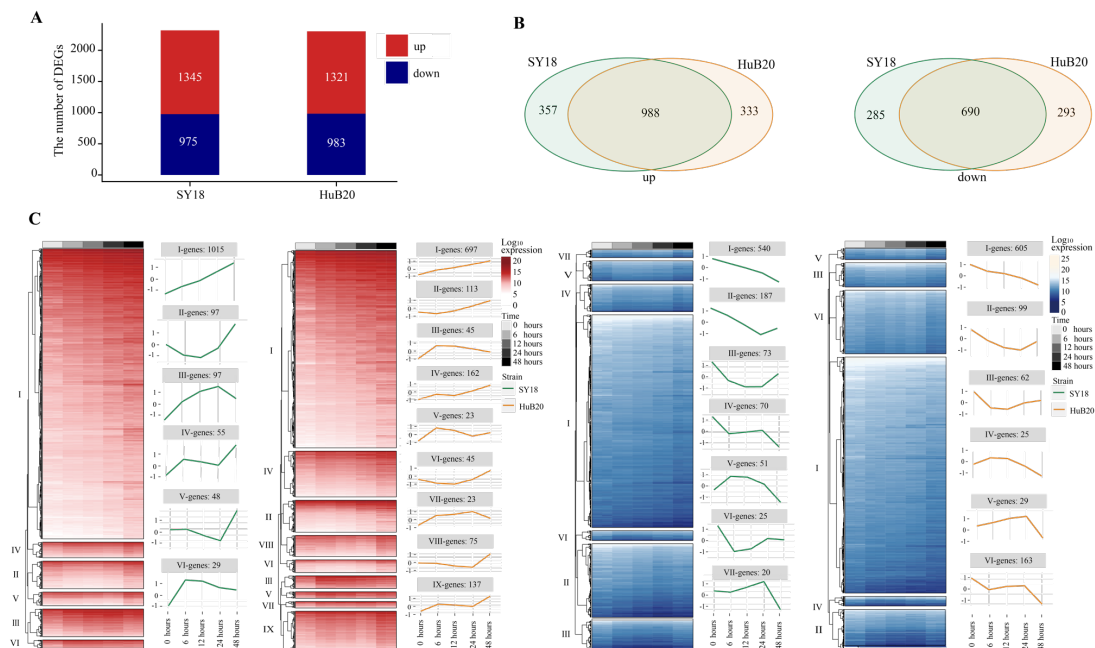

**Fig 3. Differentially expressed genes (DEGs) analysis in host with time series.** DEGs are examined by the Likelihood Ratio Test (LRT) to explore the genes with significantly differential expression levels across a series of time points ( $P < 10^{-10}$ ). (A) The stacked plot shows the number of upregulated (red) and downregulated (blue) DEGs of PAMs after being infected by SY18 (left) and HuB20 (right) strains, respectively. (B) The Venn diagrams show the shared genes in the two strains for upregulated (left) and downregulated (right) DEGs. (C) The heatmap of the DEGs with hierarchical clustering shows the expression levels of upregulated (red) and downregulated (blue) DEGs of PAMs infected by SY18 and HuB20 strains separately. The line plots illustrate the average trend of gene expression in hierarchical clusters.

196 Next we sought to identify the transcriptional program regulators, i.e., transcription factors  
 197 (TFs) enriched in different clusters of coexpressed genes, through MEME motif search on the pro-  
 198 moters of the selected genes (S3 Table). A number of TFs with known regulatory functions in the  
 199 immune response, cytokines release, and type I IFN activation were identified, such as SP1, PATZ1,  
 200 ETV5, STAT2, and IRFs (Fig S2). Interestingly, while some TFs, e.g., SP1, ETV5, STATs and IRFs,  
 201 were enriched in multiple DEG clusters, other TFs showed enrichment in specific clusters. For ex-  
 202 ample, ZN341, a transcriptional activator of STAT1 and STAT3 transcription, whose function was  
 203 involved in the regulation of immune homeostasis, was enriched only in cluster II of SY18 host  
 204 response genes. Our analysis demonstrates an intricate regulatory network for dynamic host re-  
 205 sponse transcriptional programs.

206 **Pathway enrichment analysis of host DEGs reveals proinflammatory response after ASFV**  
 207 **infection**



208 To understand the pathways and biological processes enriched in the host transcriptome response to  
 209 ASFV virus infection, we performed Gene Ontology (GO) enrichment analysis for the up- (Fig 4A,  
 210 S4 Table) and downregulated (Fig 4B, S4 Table) DEGs of the two virus strains respectively. As  
 211 expected, in the upregulated group, DEGs of both strains were significantly enriched in immune  
 212 and inflammation-associated pathways, including toll-like receptor (TLR) pathway, NF-kappaB

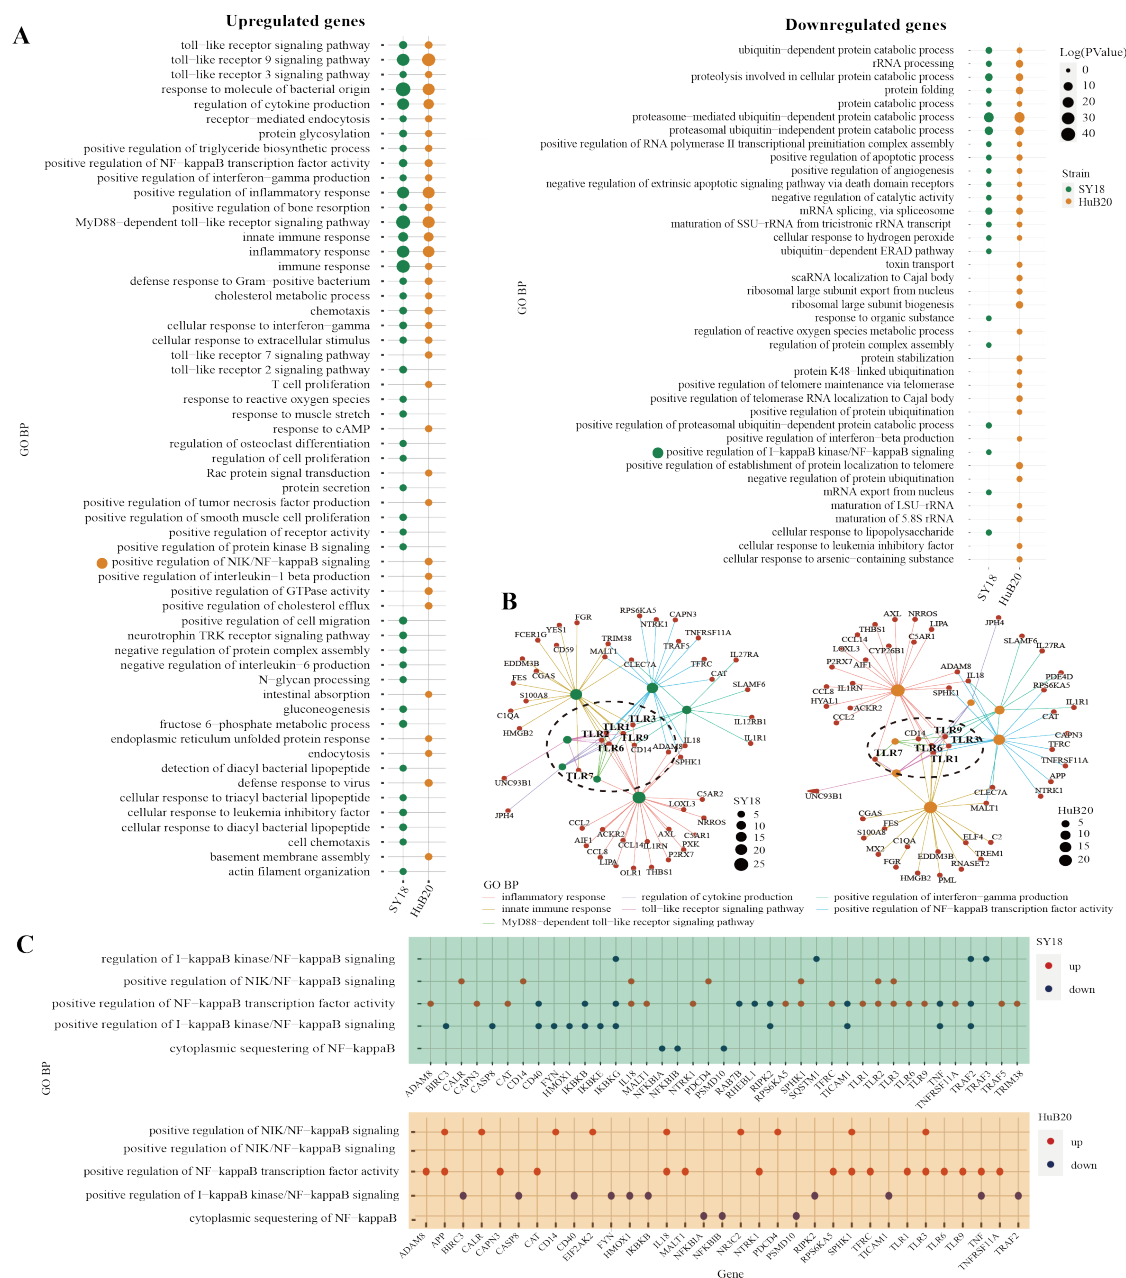

Fig 4. GO analysis of the genes with expression changes at 6, 12, 24, and 48 hpi. (A) Gene ontology biological processes (GO-BP) enrichment analysis of upregulated (left) and downregulated (right) DEGs ( $P < 10^{-10}$ ) of the two strains separately, and the bubble plot shows the GO terms with  $P < 0.01$ . (B) The network shows the relationship of most enriched up-regulated GO terms in PAMs after being infected by SY18 (left) and HuB20 (right) strains. (C) Dot plots of NF-kappaB related GO terms enriched by DEGs of PAMs after being infected by SY18 (top) or HuB20 (bottom) strains.

213 transcription activity, cytokines production and interferon gamma production. Interestingly, when  
214 we look into the relationship between the genes and top upregulated pathways, we identified TLR  
215 genes such as TLR1, TLR3, and TLR7 as connector genes amongst different pathways (Fig 4B),  
216 highlighting the upregulation of TLRs as key genes in the host response to ASFV infection. More-  
217 over, we noticed that in addition to TLR9 signaling which primarily recognizes DNA, TLR3 signal-  
218 ing, and which is located on the endosome membrane and primarily recognizes dsRNA, was also  
219 enriched. This is consistent with previous studies showing ASFV replication in the cytoplasm in-  
220 stead of the nucleus, a unique feature of ASFV compared to other DNA viruses (6, 7, 35). Thus,  
221 ASFV replication in the cytoplasm may be responsible for the activation of the TLR3 signaling,  
222 which might be a crucial step in inducing the innate immune response and inflammatory responses  
223 in the host.

224 Meanwhile, DEGs in the downregulated panel in response to both virus strains were mainly  
225 involved in the proteasome-mediated protein catabolic process and apoptotic process, suggesting  
226 both ASFV strains were able to inhibit degradation of protein catabolic process and cell death  
227 through transcription. Notably, T cell proliferation, defense response to virus, response to cAMP,  
228 and positive regulation of interleukin-1 beta production were specifically enriched in the upregu-  
229 lated DEGs of HuB20 infected cells, whereas cell chemotaxis, protein secretion, and negative reg-  
230 ulation of interleukin-6 production were enriched only in the upregulated DEGs of SY18 infected  
231 cells, indicating the two virus strains might stimulate different cytokines/chemokines response in  
232 the host.

233 To take a deeper dive into the gene-pathway relationships, we next plotted the involvement of  
234 all the DEGs related to NF-kappaB signaling in SY18 and HuB20, respectively (Fig 4C). NF-kap-  
235 paB is known as a central pathway in the host cell in response to ASFV infection (36-38). While  
236 previous studies reported expression or activity changes in genes related to NF-kappaB, neither a  
237 clear picture of the NF-kappaB response to ASFV infection, nor the similarities and differences  
238 between strains of different virulence have been described. In our analysis, both SY18 and HuB20  
239 enriched the same NF-kappaB related pathways and regulated gene expression changes in mostly  
240 the same directions (S5 Table). However, the exact DEGs involved, and the directional expression  
241 changes of DEGs were quite different. Our analysis reveals, for the first time, the differential acti-  
242 vation of the essential NF-kappaB signaling between SY18 and HuB20 through differential expres-  
243 sion regulation of NF-kappaB pathway genes.

244 **Diverse cytokines and chemokines responses induced by ASFV infection**

245 Cytokines and chemokines-mediated immune and inflammatory responses are critical for ASFV  
 246 pathogenicity (39, 40). Despite extensive efforts to study the differences in cytokines and chemo-  
 247 kines expression after ASFV infection, results reported thus far remain contradictory (31, 32). To  
 248 better understand the regulation of cytokines and chemokines by the two ASFV strains over time,  
 249 we plotted the relative expression profiles of cytokines and chemokines DEGs, and validated their  
 250 expression by RT-qPCR (Fig 5A, B). The cytokines and chemokines DEGs were grouped into three  
 251 clusters with distinct patterns in expression. The first cluster contains mainly downregulated factors  
 252 in both SY18 and HuB20 infected cells that are all involved in immune and inflammatory responses.  
 253 We validated this finding through RT-qPCR, confirming that the expression of the proinflammatory  
 254 factors IL-1 $\beta$ , CCL4, TNF and CXCL8 decreased progressively with viral infection (Fig 5B).

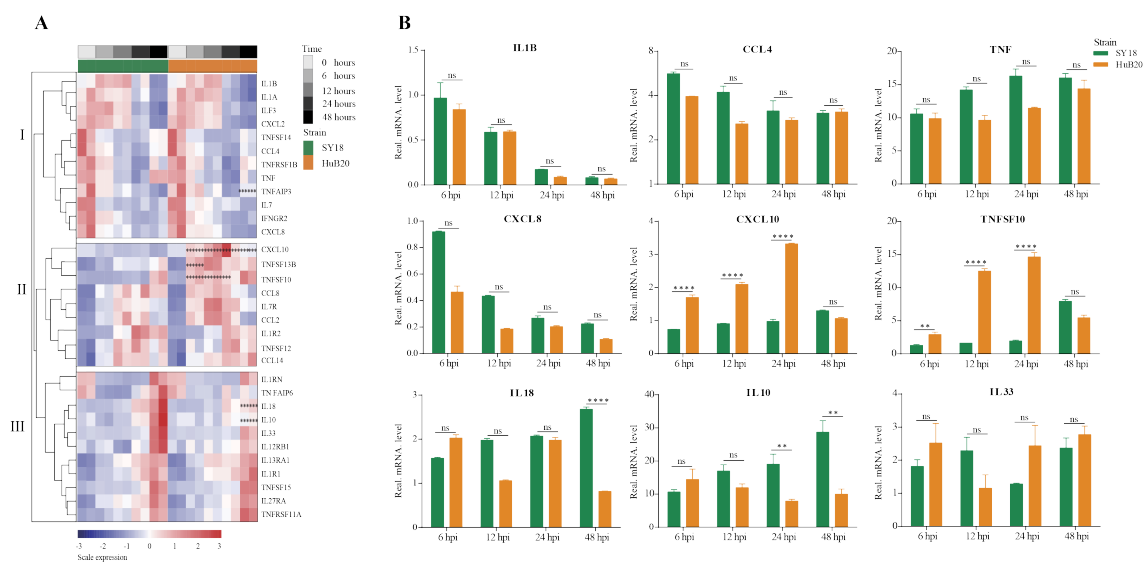

**Fig 5. Patterns of cytokines changes and chemokines expression in PAM at different times after ASFV infection.** (A) Heatmap of cytokines and chemokines expression after ASFV infection. cytokines and chemokines were divided into 3 clusters according to distinct patterns in expression over time. Dots illustrate the significance compared between two strains at the same time point with constraints the absolute value of  $\log_2$ foldchange > 1 and  $P < 0.1$ . \*,  $P < 0.1$ ; \*\*,  $P < 0.05$ ; \*\*\*,  $P < 0.01$ , ns, not significant. (B) Validation of randomly selected host cytokines and chemokines expression by real time-PCR at 6, 12, 24, and 48 h after PAMs infected by two ASFV strains (MOI= 3). Data are presented as mean  $\pm$  SD of three independent experiments. The fold-difference was measured by the  $2^{-\Delta\Delta C_t}$  method. Differences were assessed using a two-sample t-test. Significance was defined at  $P < 0.05$  and  $\log_2$ fold-change >1. \*,  $P < 0.05$ ; \*\*,  $P < 0.01$ ; \*\*\*,  $P < 0.001$ , \*\*\*\*,  $P < 0.0001$ , ns, not significant.

255 The second and third cluster cytokines and chemokines genes were all upregulated after virus  
 256 infection, including interleukins, interleukin receptors, TNF superfamily genes, and C-C motif  
 257 chemokines. Note that several genes showed significant expression differences between SY18 and  
 258 HuB20. In particular, CXCL10, TNFSF10, and TNFSF13B, critical regulator or effector genes in  
 259 immune and inflammatory responses, showed significantly increased expression in HuB20 infection  
 260 relative to SY18 from 6 hpi, suggesting that these genes might be responsible for the rapid induction

261 of a stronger immune or inflammatory response in attenuated ASFV infection. On the contrary, in-  
 262 creased expression of the inflammatory genes IL10 and IL18 at 48 hpi were significantly higher in  
 263 SY18 compared to HuB20. These cytokines might contribute to the more severe tissue damage  
 264 caused by the highly virulent strains in later stages of infection. Taken together, our cytokines and  
 265 chemokines analysis revealed integrated and complex regulation of immune and inflammatory re-  
 266 sponses following ASFV infection. Our analysis suggests differential expression of cytokines and  
 267 chemokines factors, such as IL10, IL18, CXCL10 and TNFSF10, may be associated with the dif-  
 268 ferential pathogenicity of the two ASFV strains with different virulence.

### 269 Stronger innate immune response stimulated by HuB20 than SY18

270 To further explore the differential expression program in the host response between SY18 and  
 271 HuB20 along the infection timeline, we considered the interaction term of virus strains and time  
 272 points and fitted a Likelihood Ratio Test to identify differentially expressed genes. A total of 6 clus-  
 273 ters with at least 15 genes with similar expression patterns were found (Fig 6A, S6 Table). GO  
 274 enrichment analysis of individual clusters identified cluster I and II were enriched in innate immune  
 275 response related biological processes such as type I interferon signaling, interferon-stimulated gene  
 276 15 (ISG15)-protein conjugation and the JAK-STAT cascade (S7 Table). Interestingly, starting from  
 277 6 hpi, DEGs in cluster I and II were rapidly upregulated in HuB20 infected cells while the expression  
 278 of these innate immune response related genes changed gradually in SY18 infected cells (Fig 6B),

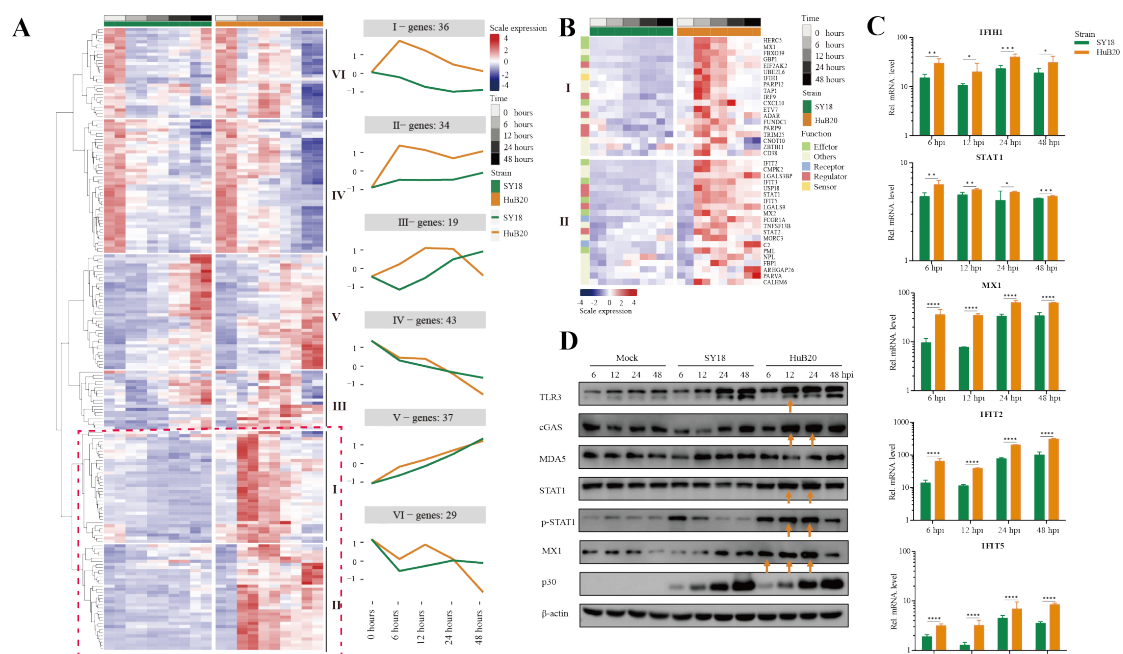

**Fig 6. Comparison of host gene expression differences.** (A) Heatmap of DEGs considering the effects of infection of SY18 and HuB20 separately over time on PAMs with the LRT test. The full model's design formula includes the effects of infection over time, and the reduced model removes this term to perform the LRT test. The line plots illustrate the average trend of gene expression in clusters. Each cluster has at least 15 genes. (B). Heatmap of the DEGs in clusters I and II, with immune related functions annotated for each gene. (C) Validation of innate immunity

associated gene expression by real time-PCR. PAMs were infected or mocked infected by ASFV SY18 and HuB20 strains, respectively (MOI= 3), at 6, 12, 24 and 48 hpi. Total RNA was extracted from the PAMs and subjected to RT-qPCR to quantitate IFIH1, STAT1, MX1, IFIT2 and IFIT5 expression. The data were normalized using  $\beta$ -actin. The fold-difference was measured by the  $2^{-\Delta\Delta C_t}$  method. Differences were assessed using a two-sample t-test. Significance was defined at  $P < 0.05$ . \*,  $P < 0.05$ , \*\*,  $P < 0.01$ ; \*\*\*,  $P < 0.001$ , \*\*\*\*,  $P < 0.0001$ , ns, not significant. (D) Western blotting analysis of innate immunity associated proteins. PAMs were infected or mocked infected by ASFV SY18 and HuB20, respectively (MOI= 3), at 6, 12, 24 and 48 hpi. Cell lysates were collected and subjected to Western blotting analysis using the indicated antibodies.

279 suggesting that the low virulent HuB20 strain could stimulate a rapid immune and defense response  
280 in the early stages of infection. In addition, we observed high transcript levels of intracellular sensors  
281 and receptors (cGAS,  $P < 3.82e^{-12}$ , PARP9,  $P < 1.35e^{-2}$ , CD38,  $P < 7.85e^{-5}$  IFIH1/MDA5,  $P < 2.05e^{-15}$   
282 <sup>15</sup> and FCGR1A,  $P < 9.96e^{-26}$ ) from 6 hpi of HuB20, whose functions were related to the recognition  
283 of viral DNA as well as viral RNA (41-45).

284 Furthermore, we noted that STAT1, STAT2, IRF9, USP18 and TRIM25 also exhibited high  
285 levels of transcription earlier in HuB20 infection than SY18. Phosphorylated STAT1 and STAT2,  
286 together with IRF9 are known to form the interferon-stimulated gene factor 3 (ISGF3) complex,  
287 which transcriptionally activates the ISGs (46, 47). In addition, the RT-qPCR results also proved  
288 that HuB20 infection induced higher levels of innate immune-related factors in PAMs than SY18  
289 infection (Fig 6C). Therefore, we suspect that activation of these regulators might contribute to the  
290 introduction of a rapid immune response by the attenuated ASFV strain. We further validated the  
291 consistency of transcriptome changes relative to the protein level using Western blotting (Fig 6D).  
292 Albeit delayed activation at protein level compared to transcript level, the innate immune response  
293 genes including cGAS, STAT1/pSTAT1 and MX1 all demonstrated high levels of activation in  
294 HuB20 infected cells compared to SY18 (Fig 6D). Taken together, we identified a subset of genes  
295 that were activated rapidly after infection with the low virulent HuB20 strain, and demonstrated for  
296 the first time, that the innate immune response involving cGAS pathway, JAK-STAT and IFN stim-  
297 ulated genes in the host cells were activated quickly after infection with the low virulent strain  
298 HuB20, while these pathways were immune escaped by the highly virulent strain SY18.

### 299 **Host-virus coexpression network reveals new insights into the functions of viral genes**

300 To explore the relationship between host and virus gene expression dynamics, we constructed  
301 a host-virus coexpression network for each of the ASFV strains (Fig 7, S8 Table). First of all, we  
302 observed a module in the SY18 network with multiple viral genes sharing similar connection to a  
303 set of host genes (Fig 7A). In particular, I196L as a hub gene shared 88% (15/17) of host coexpres-  
304 sion with NP868R, suggesting these two viral genes might be coregulated or involved in similar  
305 interactive processes with host cells.

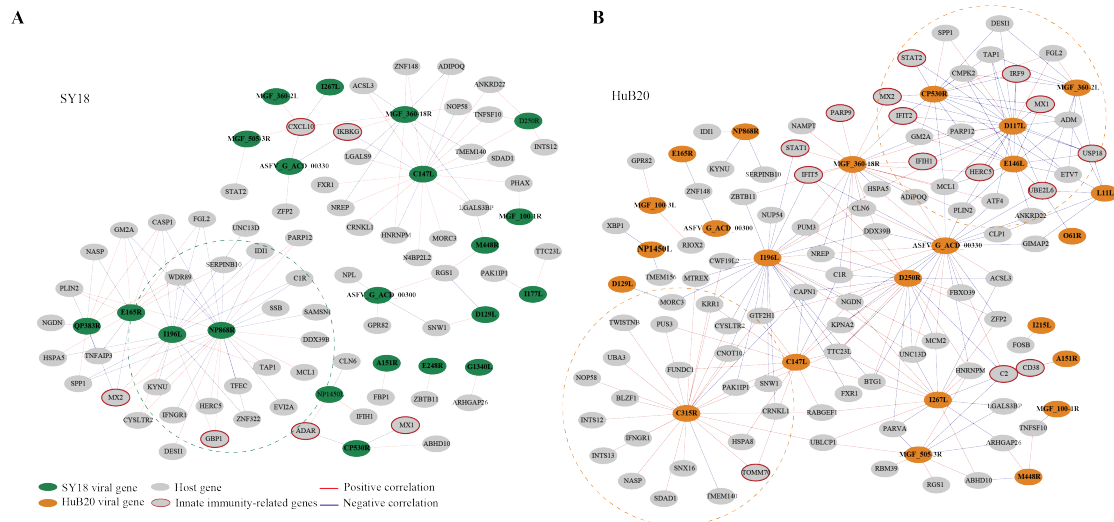

**Fig 7 Correlation between ASFV and host genes.** The correlation between the ASFV and host DEGs was measured using Pearson correlation coefficients for the corresponding gene expression and is visualized in the network for SY18 (left) and HuB20 (right) strains. The absolute value of the Pearson correlation coefficient  $> 0.9$  was considered significant. Red and blue lines indicate positive and negative correlations, respectively.

306 Secondly, we noticed that in the HuB20 network (Fig 7B), a module involving MGF\_360-2L,  
 307 CP530R, E146L and D117 viral genes was negatively correlated with innate immunity-related genes,  
 308 e.g. IRF9, USP18, UBE2L6, IRF9, STAT2, MX1/2, IFIT2 and HERC5. Among these viral genes,  
 309 MGF\_360-2L has been shown to be involved in the pathogenicity of ASFV in pigs, where deletion  
 310 of multiple MGF360 family genes increased the expression of ISG and type I IFNs in infected mac-  
 311 rophages (23, 24, 48). However, CP530R, E146L and D117 have never been reported to be associ-  
 312 ated with innate immunity, but the expression levels of these genes in HuB20 infected cells was all  
 313 significantly lower compared to SY18 (Fig S3), indicating lower expression of these genes might  
 314 account for the activated immune response in HuB20 infected cells.

315 In addition, the viral gene C315R, which encodes TFIIIB-like transcription factor, is involved  
 316 in the regulation of RNA transcription and modification (49). Indeed, we identified positive corre-  
 317 lation of C315R with RNA polymerase I subunit F (TWISTNB), integrator complex subunit 12  
 318 (INTS12) and mtr4 exosome RNA helicase (MTREX) transcription, which were involved in RNA  
 319 processing and splicing. Intriguingly, C315R was also associated with genes involved in protein  
 320 transport between the endoplasmic reticulum (ER) and Golgi, such as NOP58 ribonucleoprotein  
 321 (NOP58), basic leucine zipper nuclear factor 1 (BLZF1), sorting nexin 16 (SNX16), SDA1 domain  
 322 containing 1 (SDAD1) and nuclear autoantigenic sperm protein (NASP), indicating possible func-  
 323 tional association of C315R with protein transport of the host cells.

324 Lastly, the same viral genes (e.g. MGF\_360-18R, I196L and C147L) often associate with dif-  
 325 ferent host genes between SY18 and HuB20 infected cells, suggesting a highly dynamic interactive

326 relationship between the virus and host expression programs. Therefore, elaborating the transcrip-  
327 tional correlation between host and virus genes might provide novel insights to explore the unknown  
328 functions of some viral genes, or provide a reference map for target selection to guide vaccine or  
329 drug development for ASF disease.

330

## 331 **Discussion**

332 RNA sequencing (RNA-seq) has been applied to study various biological processes, such as reveal-  
333 ing the interaction of virus infection and host response (10, 13, 50). However, studies using RNA-  
334 seq to preform transcriptomic profiling of ASFV and infected host cells are scarce, and these studies  
335 target a single strain or time point and do not provide a comprehensive picture of host-virus inter-  
336 actions (8, 14-17). Here, we integrated RNA-seq analysis to examine and compare the tran-  
337 scriptomic landscape of porcine PAMs during infection with highly (SY18) and low virulent  
338 (HuB20) ASFV strains at different stages of infection, depicting unprecedented details about the  
339 temporal host response after ASFV infection. By combining functional enrichment analysis and  
340 experimental validation, we highlight similarities and differences in viral and host gene expression  
341 patterns and cellular pathways. In particular, we elucidated differences in host innate immune and  
342 inflammatory responses stimulated by ASFV, which may provide novel insights for intensive study  
343 of ASFV pathogenicity and therapeutic targets.

344 Several transcriptomic and other experimental studies have shown that ASFV infection leads  
345 to changes in the transcription of pattern recognition receptors (PRRs) in some TLR signaling path-  
346 ways, as well as significant changes in the transcription of some antiviral and inflammatory factors  
347 (21, 26, 51, 52). Our data show that the upregulation of multiple TLRs (e.g. TLR1, 3, 7) acts as  
348 connectors mediating the regulation of multiple responses, especially cytokines and chemokines  
349 production and innate immune signaling (Fig 4C). Furthermore, published literature has shown that  
350 infection with ASFV of different virulence can lead to differential inflammatory responses, immune  
351 responses and apoptotic processes, while the relevant mechanisms remain unclear. Interestingly, in  
352 our results, we noticed that DEGs in both SY18 and HuB20 infection were enriched to the NF-  
353 kappaB signaling pathway. By comparing the unique DEGs involved in NIK/NF-kappaB signaling  
354 and predicting their enrichment in other known pathways (Fig 4C, S6 Table), we found substantial  
355 differences between SY18 and HuB20, which may account for the different host responses they  
356 elicited. The above results provide new insights and research targets into the role of NF-kappaB-  
357 regulated immune, inflammatory and apoptotic responses in ASFV infection. Certainly, further ex-  
358 perimental data to confirm these observed relationships will facilitate the study of the mechanisms  
359 by which ASFV regulates host responses

360 We also analyzed the expression patterns of cytokines and chemokines and performed experi-  
361 mental validation by RT-qPCR after ASFV infection, revealing differences in the expression patterns  
362 of related factors caused by different ASFV strains, providing a theoretical basis for the study of  
363 ASFV pathogenicity. By comparing the differential expression programs of SY18 and HuB20 in the  
364 host response, we found that HuB20 provokes stronger host immune response at early stage than  
365 SY18, which was supported by the quickly activated high expression of receptor, sensor and regu-  
366 lator genes. In particular, the correlation network between the viral and host gene expression sug-  
367 gests a clear relationship between the HuB20 viral genes (e.g. CP530R, D117L, E146L and  
368 MGF\_360-2L) and innate immunity genes. Our analysis demonstrates that deciphering the relation-  
369 ship between virus and host genes would contribute to resolving the unknown functions of ASFV  
370 genes and deepen the investigation of host-virus interactions.

371 Our study was limited by a single viral infection dose, within sample cell heterogeneity, indi-  
372 vidual gene variability and other confounding factors, such as annotation of the reference genome.  
373 However, we compensated for the differences caused by individual cell heterogeneity to some extent  
374 by comparing and analyzing the gene expression patterns of the two virulent strains over time as  
375 well as the overall regulatory pathway changes. Meanwhile, combined with previous studies, we  
376 analyzed and presented predictive results for a comprehensive set of regulatory pathways and per-  
377 suasive targets of action following ASFV infection, which will provide insightful information for  
378 further investigations to understand the host response after ASFV infection and valid information  
379 for screening candidate targets for ASFV inhibition. Future ASFV related genomic datasets could  
380 provide the research community with important resources for ASFV studies.

381

## 382 **Materials and methods**

### 383 **Cells, viruses and antibodies**

384 Porcine alveolar macrophages (PAMs) were prepared from 2-month-old piglets bronchoalveolar  
385 lavage as described previously, cultured in Roswell Park Memorial Institute (RPMI) 1640 medium  
386 (Gibco, USA), supplemented with 10% fetal bovine serum (Gibco, USA) and grown at 37°C under  
387 5% CO<sub>2</sub> atmosphere. The ASFV SY18 strain (GenBank accession no.MH766894), a field virulent  
388 ASFV, was originally isolated from specimens in the initial ASF outbreak in China (53). The ASFV  
389 HuB20 strain (GenBank accession no.MW521382), a natural attenuated ASFV was isolated from  
390 the tissues of pigs in Hubei, China (34). The two viruses were passaged in primary PAMs and main-  
391 tained at -80°C in the biosecurity level 3 lab. The monoclonal antibodies for cGAS, TLR3, STAT1  
392 and p-STAT1 were purchased from Santa Cruz Biotechnology, USA, and anti-β-actin, IFIH1/MDA5  
393 and MX1 were purchased from Proteintech Biotechnology, USA.



### 394 **Sample Preparation for RNA-sequencing**

395 PAMs ( $10^6$  per well) were seeded in 6-well plates and mock-infected or infected with indicated  
396 ASFV strains at a multiplicity of infection of 3. After 1 hour of incubation, the viruses were removed,  
397 the cells were washed twice with PBS, and fresh 1640 medium was added. At the specified time  
398 points (0, 6, 12, 24 and 48 hpi), cells were harvested for RNA extraction

### 399 **Library preparation and RNA sequencing**

400 The cDNA libraries were prepared according to the standard Illumina protocol (NEBNext® Ultra™  
401 II RNA Library Prep Kit for Illumina®). Briefly, total RNA from the specified PAMs was treated  
402 with RNase-free DNase I (Vazyme, China) following the manufacturer's instructions. The total  
403 amount and integrity of RNA was estimated using the Bioanalyzer 2100 system (Agilent  
404 Technologies, USA) with the RNA Nano 6000 Assay Kit. First strand cDNA was synthesized using  
405 random hexamer primers and M-MuLV Reverse Transcriptase, and then RNaseH was used to  
406 degrade the RNA. Second strand cDNA synthesis was subsequently performed using DNA  
407 Polymerase I and dNTPs. After commencing PCR amplification, the PCR product was purified by  
408 AMPure XP beads, and the library was finally obtained. The libraries were quantified by an Agilent  
409 2100 bioanalyzer and then subjected to sequencing using an Illumina NovaSeq 6000 sequencer.

### 410 **Cell total RNA isolation and real-time quantitative PCR (RT-qPCR)**

411 PAMs in 6-well plates were infected with ASFV SY18 and HuB20 at 3 MOI (multiplicity of infec-  
412 tion), respectively. Mock-infected cells were used as control. Cells were collected at 6, 12, 24 and  
413 48 hours post inoculation, and total RNA was isolated using a Total RNA Kit I (Omega Bio-Tek,  
414 USA) and reverse transcribed with HiScript II Q RT SuperMix (Vazyme, China) according to the  
415 manufacturer's instructions. qPCR was performed using ChamQ Universal SYBR qPCR Master  
416 Mix (Vazyme, China) on a LightCycler® 480 Real-Time PCR System. The relative expression of  
417 mRNA was calculated based on the comparative cycle threshold ( $2^{-\Delta\Delta C_t}$ ) method and normalized  
418 with porcine  $\beta$ -actin mRNA levels. The primer sequence information is provided in S9 Table. The  
419 results were analyzed using GraphPad Prism 6 software.

### 420 **Western blotting analysis**

421 Cell lysates were subjected to 10% SDS-PAGE and then transferred to nitrocellulose (NC) mem-  
422 branes. The membranes were blocked for 1.5 h at room temperature in Tris-buffered saline contain-  
423 ing 10% nonfat dry milk and 0.05% Tween 20 (1×TBST) and were incubated at 4°C for 12 h with  
424 the indicated antibodies. The Membranes were washed with 1×TBST, incubated with horseradish  
425 peroxidase (HRP)-labeled goat anti-rabbit IgG or anti-mouse IgG antibody (Beyotime, China) at  
426 room temperature for 45 min, and treated with enhanced chemiluminescence (ECL) reagent

427 (Thermo Fisher Scientific, USA).

#### 428 **RNA-seq data quality control and read mapping**

429 Raw data (sequencing reads) in fastq format were first processed through in-house Perl scripts. In  
430 this step, clean data (clean reads) were obtained by removing reads containing adapters, reads con-  
431 taining N bases and low-quality reads from the raw data. All downstream analyses were based on  
432 cleaned data (v0.20.1) (54). The clean reads were aligned to the Sus Scrofa Largewhite\_V1  
433 (GCA\_001700135.1) and ASFV (SY18 (GenBank accession no.MH766894) and HuB20 (GenBank  
434 accession no.MW521382)) genome assemblies using STAR (v2.7.8a) with default parameters (55).  
435 Uniquely mapped read pairs were counted using featureCounts (v2.0.1) (56). To make the count  
436 matrix more comparable among samples, normalization is the critical process of scaling raw counts.  
437 Hence, the count matrix was normalized based on the median of ratios method using the R package  
438 DESeq2 (v1.32.0), and the rlog transformation was performed for PCA plots (57).

#### 439 **Differential expression analysis**

440 Differential expression analysis was performed using DESeq2 exploiting the likelihood ratio test  
441 (LRT) and testing a full and reduced formula for time-course analyses for each strain of the virus  
442 separately with a  $P < 10^{-10}$  (Fig 3). LRT is used to explore whether there are significant differences  
443 in the effect of the timeline. However, for those differentially expression genes, the expression var-  
444 iations were not consistent. Hence, after filtering genes that were significantly different over time,  
445 we clustered the genes using DEGreport (v1.28.0) in R to sort genes into groups based on shared  
446 expression patterns (60). In addition, we compared the gene expression levels of PAM cells infected  
447 by two strains at each time point to explore significant genes with  $\text{padj} < 0.1$  and the absolute value  
448 of  $\log_2\text{FoldChange} \geq 1$  by DESeq2 Wald Test (Fig 5).

449 We are also interested in the differences in gene expression between SY18 and HuB20 infection  
450 over time. In other words, we want to compare expression levels by considering two conditions,  
451 virus and time, at the same time. Hence, we use a design formula for our full model to explore the  
452 difference between the two strains in the effect of the infection over time (virus: time). To perform  
453 the LRT test as we used before, we also need a reduced model without the interaction term virus:  
454 time. After applying the LRT test, significant genes were identified using a threshold  $\text{padj} < 0.01$   
455 (Fig 6). Differentially expressed viral genes were identified using a similar method, and the Pearson  
456 correlation coefficient between the host significant gene and the viral significant gene was computed.

457 Further analysis of ASFV genes used their noted or predicted functions, from the VOCS tool  
458 database (<https://4virology.net/>) entries for the SY18 and HuB20 genomes.

## 459 **Enrichment analysis of differentially expressed genes**

460 Gene ontology (GO) analysis was performed on the differentially expressed genes on the DAVID  
461 2021 website with default parameters using direct GO biological process categorization (58). Then  
462 we displayed the most significantly enriched terms ( $P < 0.01$ ) in bubble plots. However, to better  
463 understand the potential biological complexities in which one gene may involve multiple categories,  
464 we used the tool provided by clusterProfiler (v4.0.5) in R to depict the linkage of genes and GO  
465 terms as a network (59).

## 466 **Promoter Motif Analysis**

467 Two hundred bases upstream and fifty bases downstream of the transcriptional start site (TSS) se-  
468 quences of genes in each cluster (13 clusters in SY18 and 15 clusters in HuB20) were extracted  
469 from the large white genome (GCA\_001700135.1) in FASTA format using BEDtools. Sequences  
470 were analyzed in MEME (<http://meme-suite.org>) by using Human DNA motif database (HOCO-  
471 MOCOv11 core HUMAN mono meme format) for enrichment. The output from MEME is a list of  
472 the sequences for which the E-value is less than 10. For the site positional distribution diagrams, all  
473 sequences are aligned on their centers. Position frequency matrices (PFMs) of motifs of interest  
474 were drawn by the R package motifStack (v1.40.0) (60).

475

## 476 **Supporting information**

477 **S1 Table. ASFV gene counts and functional annotation. (XLSX)**

478 **S2 Table. Host gene counts and DEGs with time series. (XLSX)**

479 **S3 Table. Host gene promoter motif. (XLSX)**

480 **S4 Table. GO BP enrichment of host DEGs with time series. (XLSX)**

481 **S5 Table. Host DEGs involved in NF- $\kappa$ B related pathways. (XLSX)**

482 **S6 Table. Classification of DEGs between two strains across time points. (XLSX)**

483 **S7 Table. GO BP enrichment of DEGs in clusters I and II between the two strains across time  
484 points. (XLSX)**

485 **S8 Table. Pearson correlation between viral DEGs and host DEGs. (XLSX)**

486 **S9 Table. Primers for real time-PCR validation.**

487

## 488 **Acknowledgments**

489 Thanks for the technical support by the core facilities of Zhejiang University Medical Center and  
490 Liangzhu Laboratory.

491

## 492 **Author Contributions**

493 N.S. conceived the study; N.S., Z.S., T.C., and L.L. designed the experiment. L.L. and Y.Z. per-  
494 formed the experiments. T.Z., A.A., and X.Z. analyzed the data. N.S., Z.S., and T.C. directed the  
495 study. N.S., L.L., and T.Z. wrote the paper.

496

#### 497 **Financial Disclosure Statement**

498 This work is funded by the Starting Fund from Zhejiang University and Shandong Major Project of  
499 the Science and Technology Innovation (2019JZZY020606).

500

#### 501 **References**

- 502 1. Wang F, Zhang H, Hou L, Yang C, Wen Y. Advance of African swine fever virus in recent  
503 years. RES VET SCI. 2021; 136:535-9.
- 504 2. Gaudreault NN, Madden DW, Wilson WC, Trujillo JD, Richt JA. African Swine Fever Virus:  
505 An Emerging DNA Arbovirus. *Frontiers in Veterinary Science*. 2020 2020-05-13;7.
- 506 3. Galindo I, Alonso C. African Swine Fever Virus: A Review. *Viruses*. 2017 2017-05-  
507 10;9(5):103.
- 508 4. Revilla Y, Perez-Nunez D, Richt JA. African Swine Fever Virus Biology and Vaccine Ap-  
509 proaches. *ADV VIRUS RES*. 2018 2018-01-20; 100:41-74.
- 510 5. Sun E, Huang L, Zhang X, Zhang J, Shen D, Zhang Z, et al. Genotype I African swine fever  
511 viruses emerged in domestic pigs in China and caused chronic infection. *EMERG MICROBES IN-*  
512 *FEC*. 2021 2021-01-01;10(1):2183-93.
- 513 6. Dixon LK, Chapman DAG, Netherton CL, Upton C. African swine fever virus replication and  
514 genomics. *VIRUS RES*. 2013;173(1):3-14.
- 515 7. Simões M, Freitas FB, Leitão A, Martins C, Ferreira F. African swine fever virus replication  
516 events and cell nucleus: New insights and perspectives. *VIRUS RES*. 2019; 270:197667.
- 517 8. Cackett G, Sýkora M, Werner F. Transcriptome view of a killer: African swine fever virus.  
518 *BIOCHEM SOC T*. 2020 2020-08-28;48(4):1569-81.
- 519 9. Cackett G, Matelska D, Sykora M, Portugal R, Malecki M, Bahler J, et al. The African Swine  
520 Fever Virus Transcriptome. *J VIROL*. 2020 2020-04-16;94(9).
- 521 10. Ji F, Sadreyev RI. RNA-seq: Basic Bioinformatics Analysis. *Curr Protoc Mol Biol*. 2018 2018-  
522 10-01;124(1):e68.
- 523 11. Geraci F, Saha I, Bianchini M. Editorial: RNA-Seq Analysis: Methods, Applications and Chal-  
524 lenges. *FRONT GENET*. 2020 2020-01-20; 11:220.
- 525 12. Chatterjee A, Ahn A, Rodger EJ, Stockwell PA, Eccles MR. A Guide for Designing and Ana-  
526 lyzing RNA-Seq Data. *Methods Mol Biol*. 2018 2018-01-20; 1783:35-80.
- 527 13. Zhang H, He L, Cai L. Transcriptome Sequencing: RNA-Seq. *Methods Mol Biol*. 2018 2018-  
528 01-20; 1754:15-27.
- 529 14. Cackett G, Portugal R, Matelska D, Dixon L, Werner F. African Swine Fever Virus and Host

- 530 Response: Transcriptome Profiling of the Georgia 2007/1 Strain and Porcine Macrophages. *J VI-*  
531 *ROL*. 2022 2022-03-09;96(5): e193921.
- 532 15. Jaing C, Rowland RRR, Allen JE, Certoma A, Thissen JB, Bingham J, et al. Gene expression  
533 analysis of whole blood RNA from pigs infected with low and high pathogenic African swine fever  
534 viruses. *SCI REP-UK*. 2017;7(1).
- 535 16. Yang B, Shen C, Zhang D, Zhang T, Shi X, Yang J, et al. Mechanism of interaction between  
536 virus and host is inferred from the changes of gene expression in macrophages infected with African  
537 swine fever virus CN/GS/2018 strain. *VIROL J*. 2021;18(1).
- 538 17. Zhu JJ, Ramanathan P, Bishop EA, O'Donnell V, Gladue DP, Borca MV. Mechanisms of Af-  
539 rican swine fever virus pathogenesis and immune evasion inferred from gene expression changes in  
540 infected swine macrophages. *PLOS ONE*. 2019 2019-11-14;14(11): e223955.
- 541 18. Zhang F, Hopwood P, Abrams CC, Downing A, Murray F, Talbot R, et al. Macrophage Tran-  
542 scriptional Responses following in Vitro Infection with a Highly Virulent African Swine Fever Vi-  
543 rus Isolate. *J VIROL*. 2006;80(21):10514-21.
- 544 19. Chaulagain S, Delhon GA, Khatiwada S, Rock DL. African Swine Fever Virus CD2v Protein  
545 Induces  $\beta$ -Interferon Expression and Apoptosis in Swine Peripheral Blood Mononuclear Cells. *Vi-*  
546 *ruses*. 2021 2021-07-28;13(8):1480.
- 547 20. Frączyk M, Woźniakowski G, Kowalczyk A, Bocian A, Kozak E, Niemczuk K, et al. Evolution  
548 of African swine fever virus genes related to evasion of host immune response. *VET MICROBIOL*.  
549 2016; 193:133-44.
- 550 21. Li J, Song J, Kang L, Huang L, Zhou S, Hu L, et al. pMGF505-7R determines pathogenicity  
551 of African swine fever virus infection by inhibiting IL-1 $\beta$  and type I IFN production. *PLOS*  
552 *PATHOG*. 2021 2021-07-26;17(7): e1009733.
- 553 22. Dixon LK, Islam M, Nash R, Reis AL. African swine fever virus evasion of host defences.  
554 *VIRUS RES*. 2019 2019-06-01; 266:25-33.
- 555 23. O'Donnell V, Holinka LG, Gladue DP, Sanford B, Krug PW, Lu X, et al. African Swine Fever  
556 Virus Georgia Isolate Harboring Deletions of MGF360 and MGF505 Genes Is Attenuated in Swine  
557 and Confers Protection against Challenge with Virulent Parental Virus. *J VIROL*.  
558 2015;89(11):6048-56.
- 559 24. O'Donnell V, Holinka LG, Sanford B, Krug PW, Carlson J, Pacheco JM, et al. African swine  
560 fever virus Georgia isolate harboring deletions of 9GL and MGF360/505 genes is highly attenuated  
561 in swine but does not confer protection against parental virus challenge. *VIRUS RES*. 2016; 221:8-  
562 14.
- 563 25. Zhang K, Yang B, Shen C, Zhang T, Hao Y, Zhang D, et al. MGF360-9L Is a Major Virulence  
564 Factor Associated with the African Swine Fever Virus by Antagonizing the JAK/STAT Signaling  
565 Pathway. *MBIO*. 2022 2022-01-01;13(1): e233021.
- 566 26. Li D, Yang W, Li L, Li P, Ma Z, Zhang J, et al. African Swine Fever Virus MGF-505-7R  
567 Negatively Regulates cGAS-STING-Mediated Signaling Pathway. *J IMMUNOL*. 2021 2021-04-

- 568 15;206(8):1844-57.
- 569 27. Ramasamy S, Subbian S. Critical Determinants of Cytokine Storm and Type I Interferon Re-  
570 sponse in COVID-19 Pathogenesis. *CLIN MICROBIOL REV.* 2021 2021-06-16;34(3).
- 571 28. Liu C, Chu D, Kalantar Zadeh K, George J, Young HA, Liu G. Cytokines: From Clinical Sig-  
572 nificance to Quantification. *ADV SCI.* 2021;8(15):2004433.
- 573 29. Propper DJ, Balkwill FR. Harnessing cytokines and chemokines for cancer therapy. *Nature*  
574 *reviews. Clinical oncology.* 2022 2022-01-01;19(4):237-53.
- 575 30. Mantovani A, Dinarello CA, Molgora M, Garlanda C. Interleukin-1 and Related Cytokines in  
576 the Regulation of Inflammation and Immunity. *Immunity (Cambridge, Mass.).* 2019 2019-01-  
577 01;50(4):778-95.
- 578 31. Wang S, Zhang J, Zhang Y, Yang J, Wang L, Qi Y, et al. Cytokine Storm in Domestic Pigs  
579 Induced by Infection of Virulent African Swine Fever Virus. *Frontiers in Veterinary Science.* 2021  
580 2021-01-22;7.
- 581 32. Gil S, Sepúlveda N, Albina E, Leitão A, Martins C. The low-virulent African swine fever virus  
582 (ASFV/NH/P68) induces enhanced expression and production of relevant regulatory cytokines  
583 (IFN $\alpha$ , TNF $\alpha$  and IL12p40) on porcine macrophages in comparison to the highly virulent  
584 ASFV/L60. *ARCH VIROL.* 2008;153(10):1845-54.
- 585 33. Franzoni G, Razzuoli E, Dei GS, Carta T, Galleri G, Zinellu S, et al. Comparison of Macro-  
586 phage Responses to African Swine Fever Viruses Reveals that the NH/P68 Strain is Associated with  
587 Enhanced Sensitivity to Type I IFN and Cytokine Responses from Classically Activated Macro-  
588 phages. *Pathogens.* 2020 2020-03-12;9(3).
- 589 34. Zhang Y, Zhang J, Yang J, Yang J, Han X, Mi L, et al. Identification of a natural variant strain  
590 of African swine fever virus. *Chinese Journal of Veterinary Science* 2021 2021-02-01;41(02):199-  
591 207.
- 592 35. Wang N, Zhao D, Wang J, Zhang Y, Wang M, Gao Y, et al. Architecture of African swine  
593 fever virus and implications for viral assembly. *SCIENCE.* 2019 2019-11-01;366(6465):640-4.
- 594 36. Yang J, Li S, Feng T, Zhang X, Yang F, Cao W, et al. African Swine Fever Virus F317L  
595 Protein Inhibits NF-kappaB Activation to Evade Host Immune Response and Promote Viral Repli-  
596 cation. *MSPHERE.* 2021 2021-10-27;6(5): e65821.
- 597 37. Gao Q, Yang Y, Feng Y, Quan W, Luo Y, Wang H, et al. Effects of the NF- $\kappa$ B Signaling  
598 Pathway Inhibitor BAY11-7082 in the Replication of ASFV. *Viruses.* 2022 2022-01-31;14(2):297.
- 599 38. Barrado-Gil L, Del Puerto A, Galindo I, Cuesta-Gejijo MÁ, García-Dorival I, de Motes CM, et  
600 al. African Swine Fever Virus Ubiquitin-Conjugating Enzyme Is an Immunomodulator Targeting  
601 NF- $\kappa$ B Activation. *Viruses.* 2021 2021-06-17;13(6):1160.
- 602 39. Zhou P, Li LF, Zhang K, Wang B, Tang L, Li M, et al. Deletion of the H240R Gene of African  
603 Swine Fever Virus Decreases Infectious Progeny Virus Production Due to Aberrant Virion Mor-  
604 phogenesis and Enhances Inflammatory Cytokine Expression in Porcine Macrophages. *J VIROL.*  
605 [Journal Article; Research Support, Non-U.S. Gov't]. 2022 2022-02-09;96(3): e166721.

- 606 40. García-Belmonte R, Pérez-Núñez D, Pittau M, Richt JA, Revilla Y. African Swine Fever Virus  
607 Armenia/07 Virulent Strain Controls Interferon Beta Production through the cGAS-STING Pathway.  
608 J VIROL. 2019 2019-06-15;93(12).
- 609 41. Horenstein AL, Faini AC, Malavasi F. CD38 in the age of COVID-19: a medical perspective.  
610 PHYSIOL REV. 2021 2021-10-01;101(4):1457-86.
- 611 42. Iwata H, Goettsch C, Sharma A, Ricchiuto P, Goh WWB, Halu A, et al. PARP9 and PARP14  
612 cross-regulate macrophage activation via STAT1 ADP-ribosylation. NAT COMMUN. 2016;7(1).
- 613 43. Hopfner KP, Hornung V. Molecular mechanisms and cellular functions of cGAS-STING sig-  
614 nalling. Nat Rev Mol Cell Biol. 2020 2020-09-01;21(9):501-21.
- 615 44. Kato H, Takeuchi O, Sato S, Yoneyama M, Yamamoto M, Matsui K, et al. Differential roles  
616 of MDA5 and RIG-I helicases in the recognition of RNA viruses. NATURE. 2006;441(7089):101-  
617 5.
- 618 45. Huang X, Tang T, Zhang G, Liang T. Identification of tumor antigens and immune subtypes  
619 of cholangiocarcinoma for mRNA vaccine development. MOL CANCER. 2021;20(1).
- 620 46. Villarino AV, Kanno Y, O'Shea JJ. Mechanisms and consequences of Jak-STAT signaling in  
621 the immune system. NAT IMMUNOL. 2017;18(4):374-84.
- 622 47. Honda K, Taniguchi T. IRFs: master regulators of signalling by Toll-like receptors and cyto-  
623 solic pattern-recognition receptors. NAT REV IMMUNOL. 2006;6(9):644-58.
- 624 48. Afonso CL, Piccone ME, Zaffuto KM, Neilan J, Kutish GF, Lu Z, et al. African swine fever  
625 virus multigene family 360 and 530 genes affect host interferon response. J VIROL. 2004 2004-02-  
626 01;78(4):1858-64.
- 627 49. Farlow J, Donduashvili M, Kokhreidze M, Kotorashvili A, Vepkhvadze NG, Kotaria N, et al.  
628 Intra-epidemic genome variation in highly pathogenic African swine fever virus (ASFV) from the  
629 country of Georgia. VIROL J. 2018;15(1).
- 630 50. Stark R, Grzelak M, Hadfield J. RNA sequencing: the teenage years. NAT REV GENET. 2019  
631 2019-11-01;20(11):631-56.
- 632 51. Riera E, Pérez-Núñez D, García-Belmonte R, Miorin L, García-Sastre A, Revilla Y. African  
633 Swine Fever Virus Induces STAT1 and STAT2 Degradation to Counteract IFN-I Signaling. FRONT  
634 MICROBIOL. 2021 2021-08-26;12.
- 635 52. Golding JP, Goatley L, Goodbourn S, Dixon LK, Taylor G, Netherton CL. Sensitivity of Afri-  
636 can swine fever virus to type I interferon is linked to genes within multigene families 360 and 505.  
637 VIROLOGY. 2016; 493:154-61.
- 638 53. Zhou X, Li N, Luo Y, Liu Y, Miao F, Chen T, et al. Emergence of African Swine Fever in  
639 China, 2018. TRANSBOUND EMERG DIS. 2018 2018-12-01;65(6):1482-4.
- 640 54. Chen S, Zhou Y, Chen Y, Gu J. fastp: an ultra-fast all-in-one FASTQ preprocessor. BIOIN-  
641 FORMATICS. 2018 2018-09-01;34(17): i884-90.
- 642 55. Dobin A, Davis CA, Schlesinger F, Drenkow J, Zaleski C, Jha S, et al. STAR: ultrafast univer-  
643 sal RNA-seq aligner. BIOINFORMATICS. 2013 2013-01-01;29(1):15-21.

- 644 56. Liao Y, Smyth GK, Shi W. featureCounts: an efficient general purpose program for assigning  
645 sequence reads to genomic features. *BIOINFORMATICS*. 2014 2014-04-01;30(7):923-30.
- 646 57. Love MI, Huber W, Anders S. Moderated estimation of fold change and dispersion for RNA-  
647 seq data with DESeq2. *GENOME BIOL*. 2014;15(12).
- 648 58. Huang DW, Sherman BT, Lempicki RA. Systematic and integrative analysis of large gene lists  
649 using DAVID bioinformatics resources. *NAT PROTOC*. 2009;4(1):44-57.
- 650 59. Yu G, Wang L, Han Y, He Q. clusterProfiler: An R Package for Comparing Biological Themes  
651 Among Gene Clusters. *OMICS: A Journal of Integrative Biology*. 2012;16(5):284-7.
- 652 60. Ou J, Wolfe SA, Brodsky MH, Zhu LJ. motifStack for the analysis of transcription factor bind-  
653 ing site evolution. *NAT METHODS*. 2018 2018-01-03;15(1):8-9.
- 654
